# Supplementary material for: M2 Muscarinic Receptor Stimulation Induces Autophagy in Human Glioblastoma Cancer Stem Cells via mTOR Complex-1 Inhibition
Source: Preprints.org preprint supplement (doi:10.20944/preprints202310.1912.v1), 2023-10-30

# LC3B

# U251 48h

LC3B-I  
LC3B-II

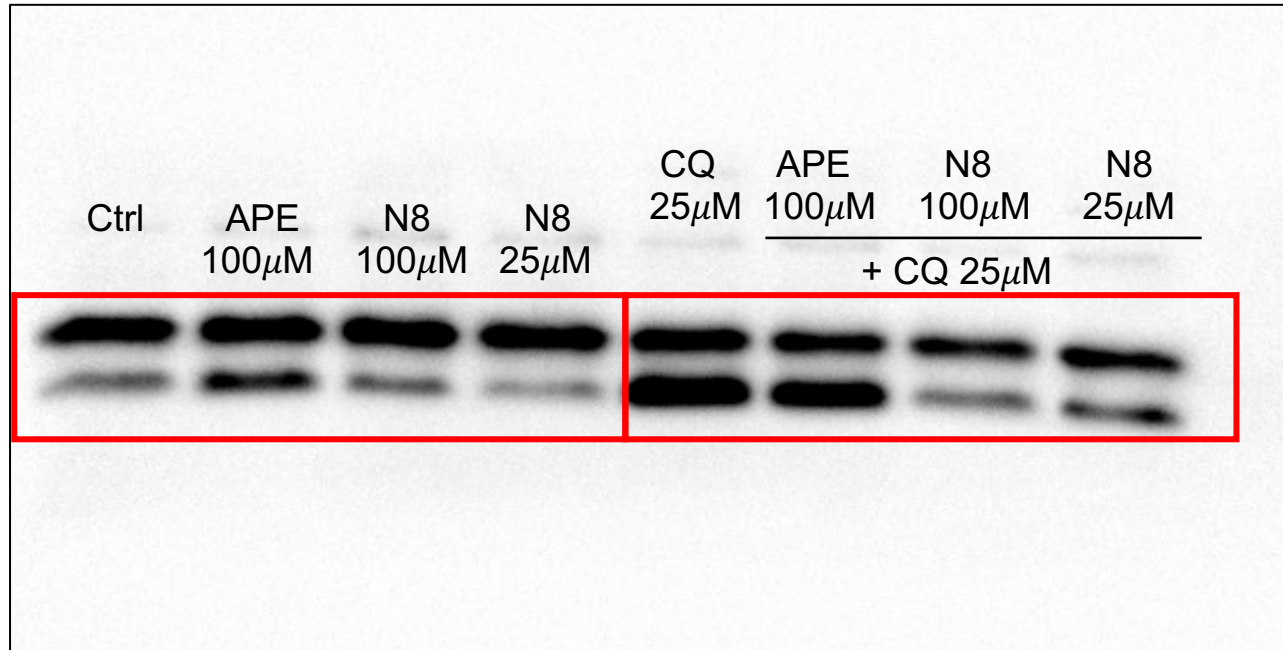

16 KDa  
14 KDa

LC3B Merge

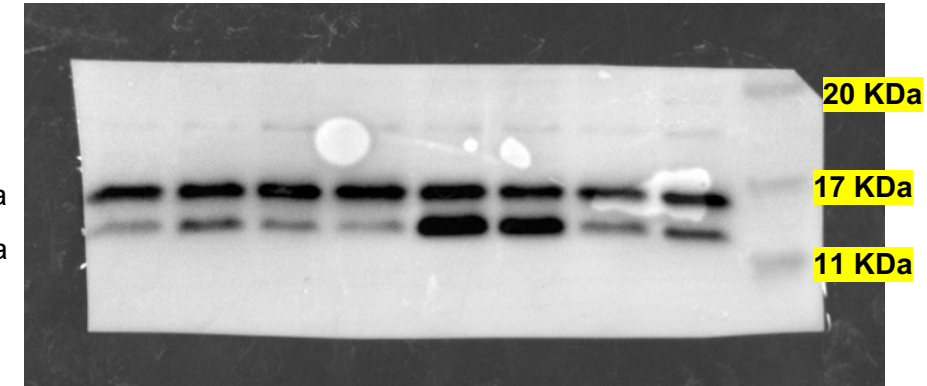

Actin

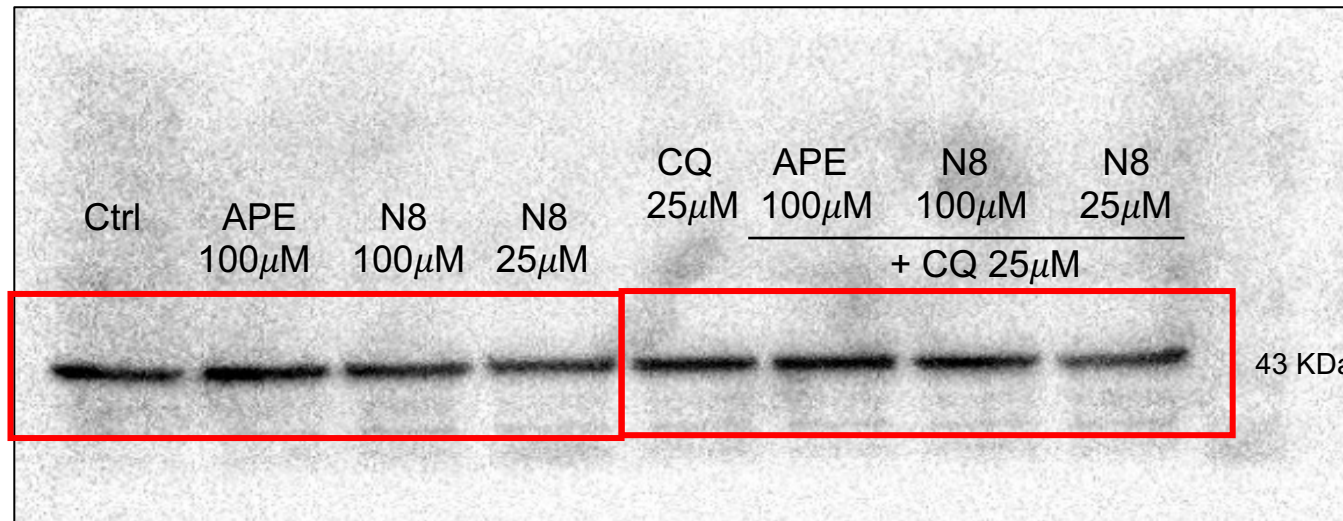

43 KDa

Actin Merge

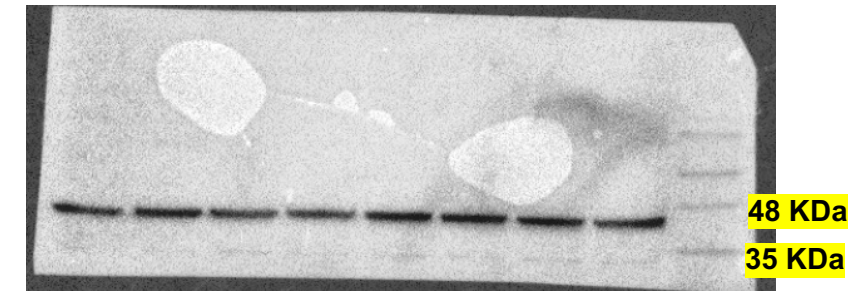

# LC3B

# U251 72h

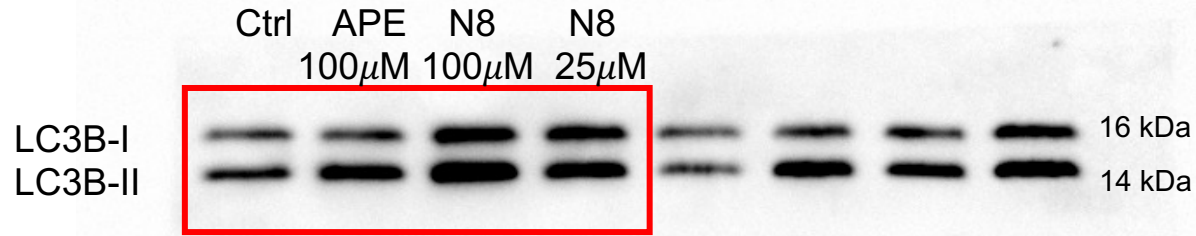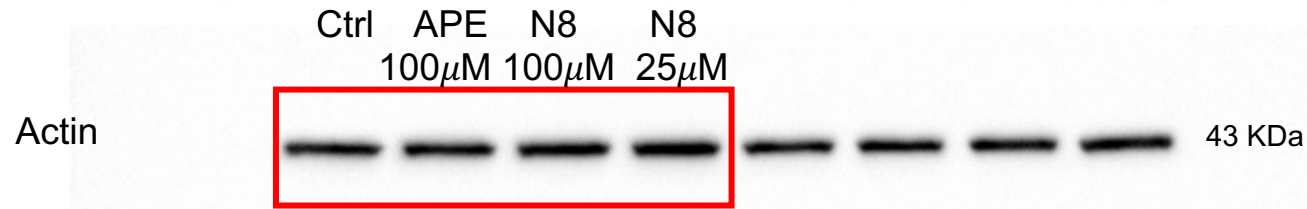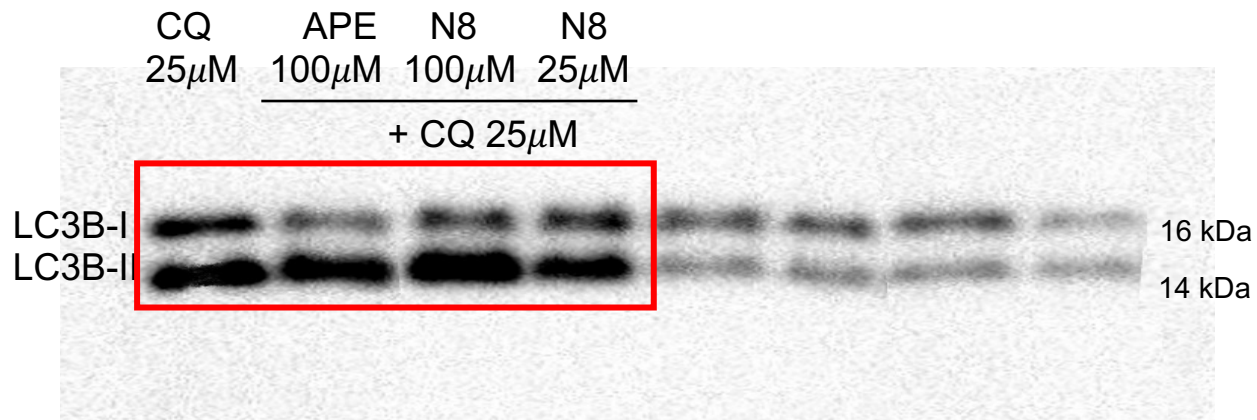

## LC3B Merge

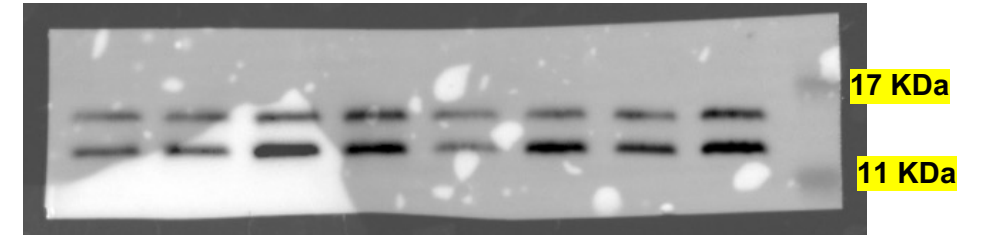

## Actin Merge

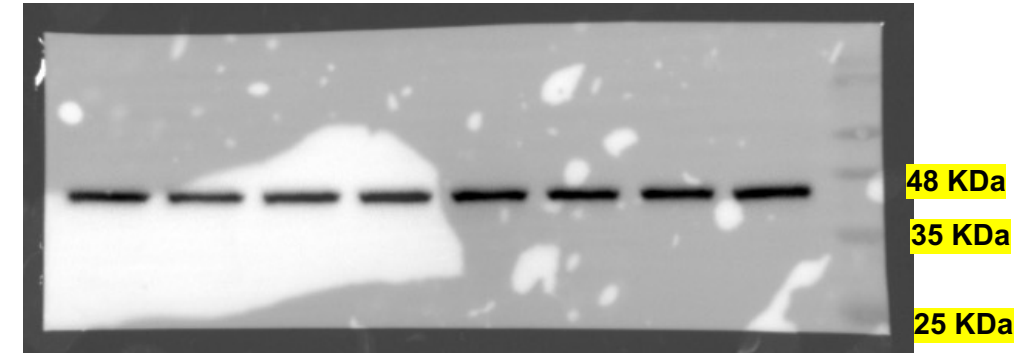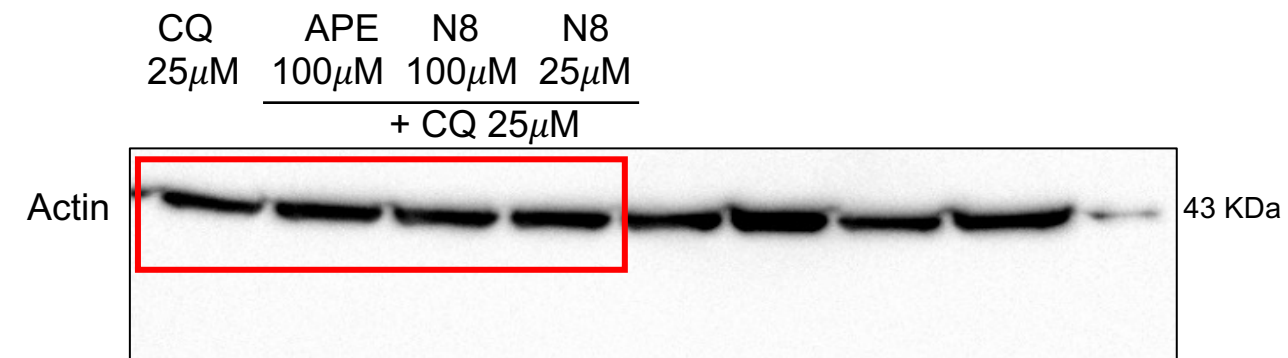

# LC3B

# GB7 48h

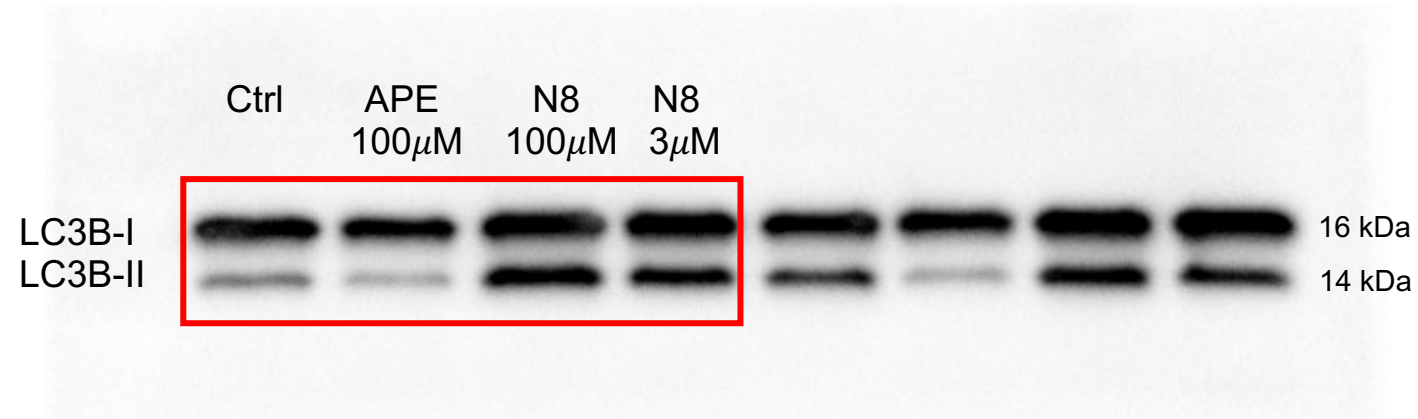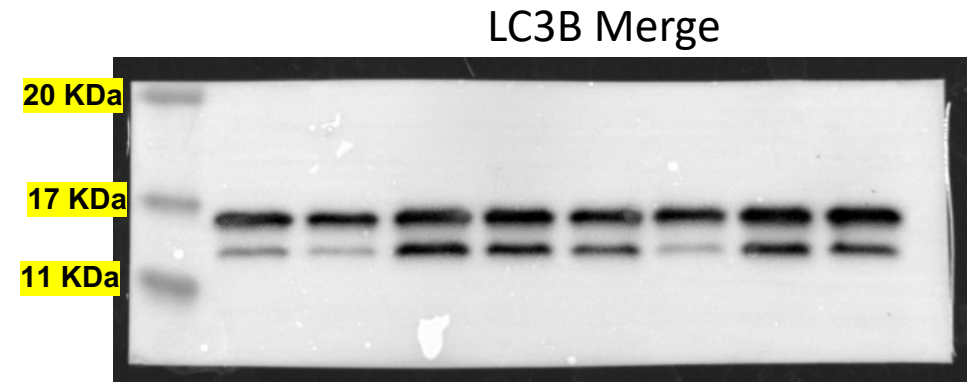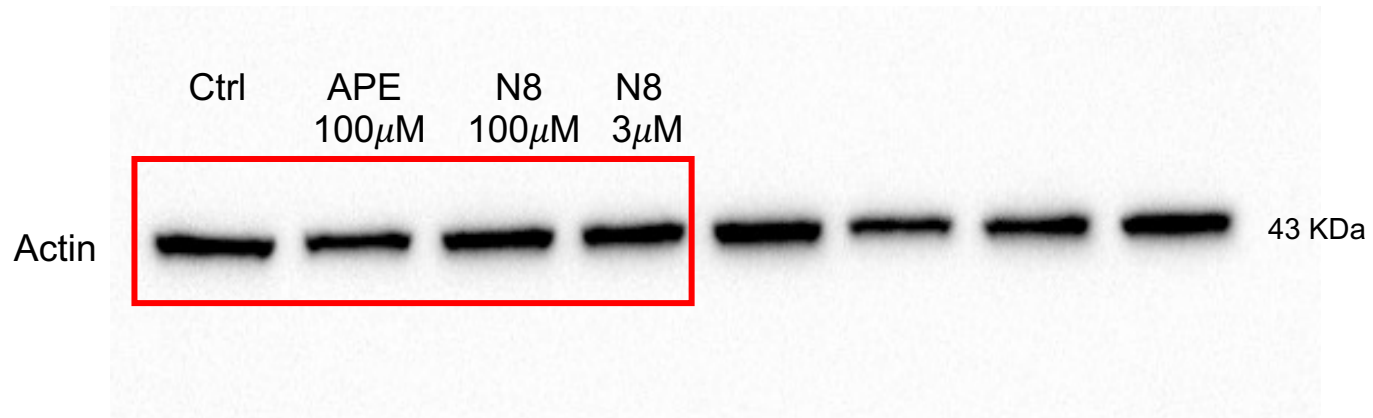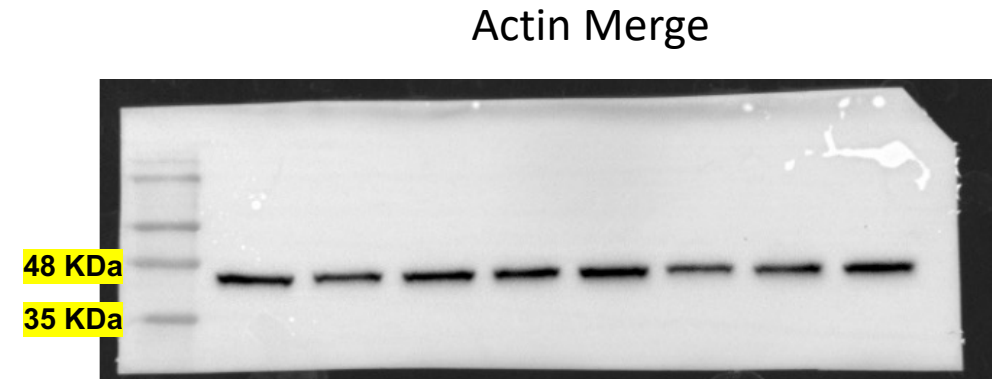

# LC3B

# GB7 48h

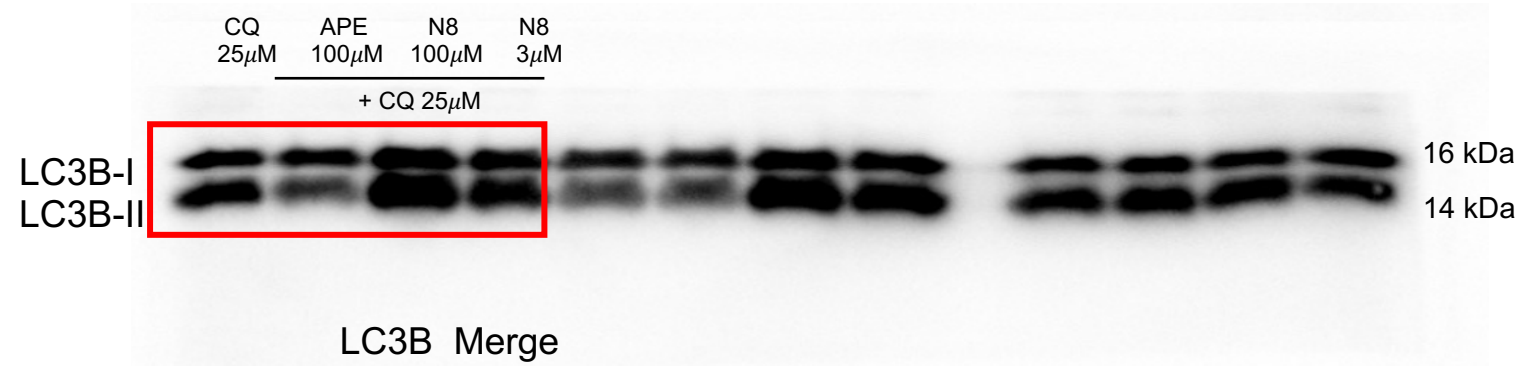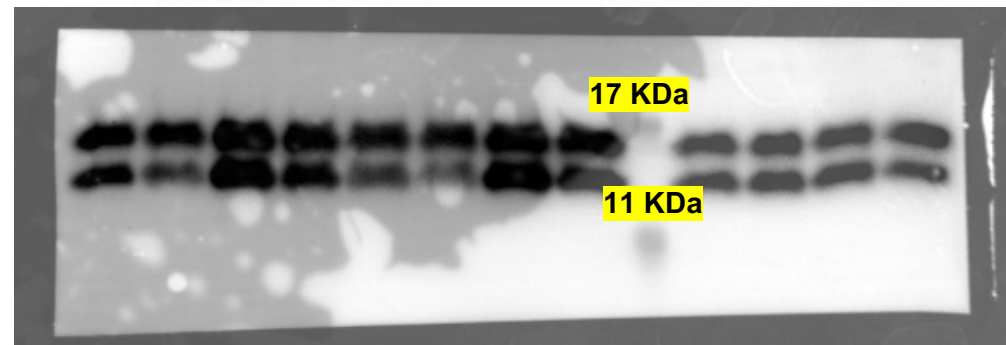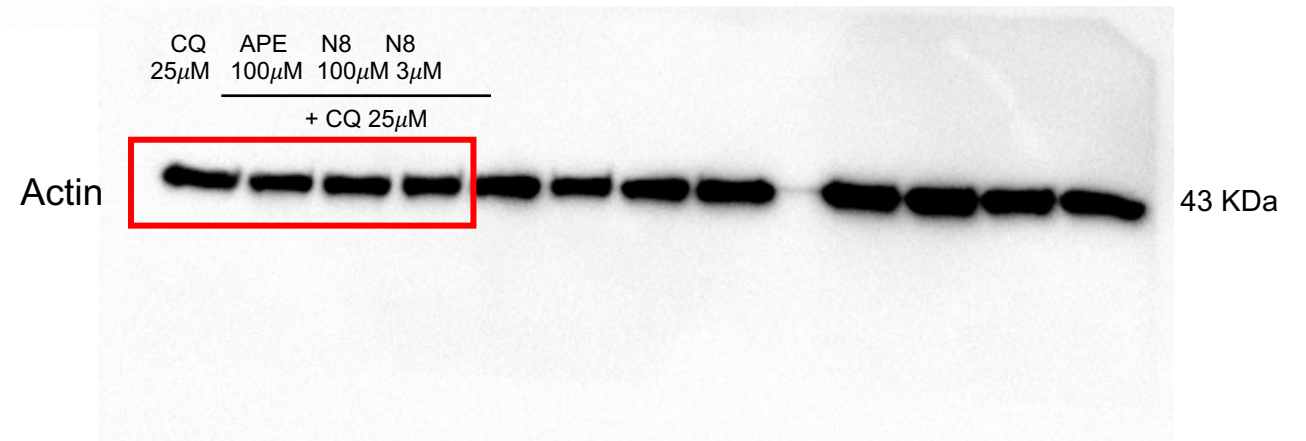



PI3K

72h

U251

PI3K

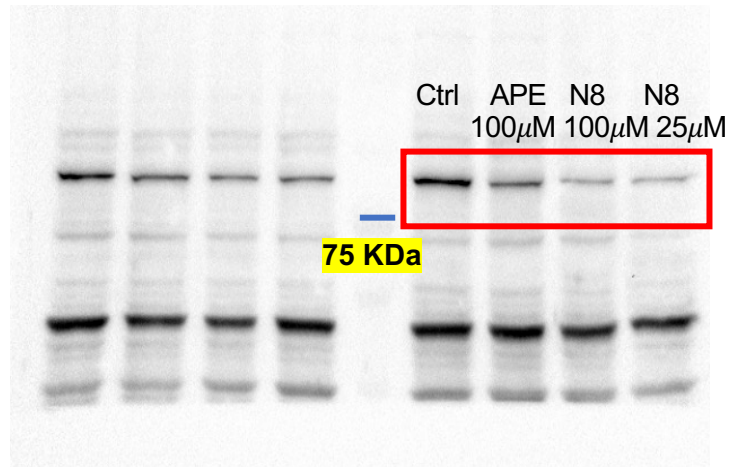

Actin

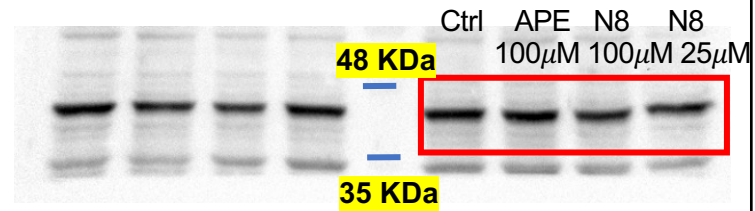

GB7

PI3K

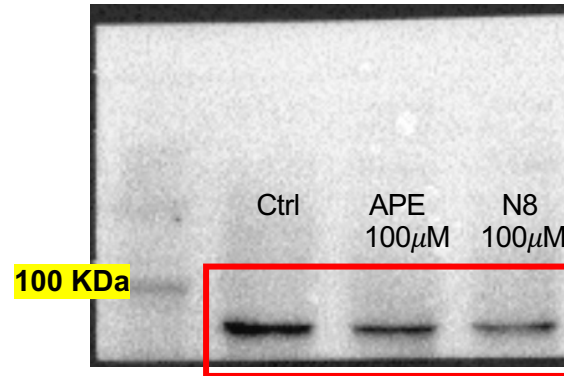

PI3K

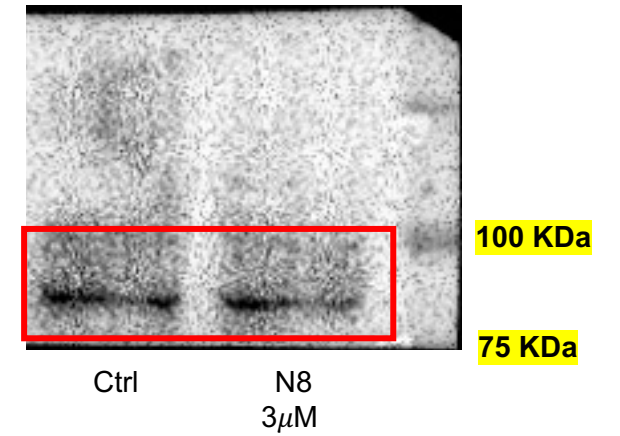

Actin

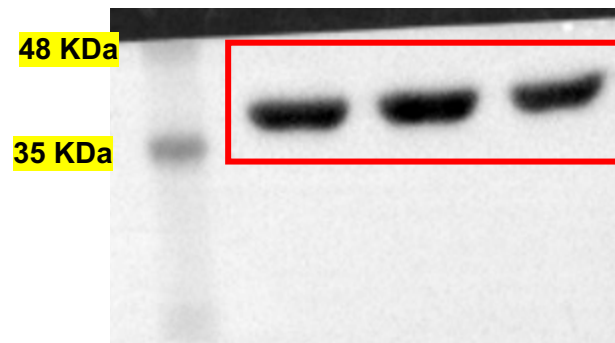

Actin

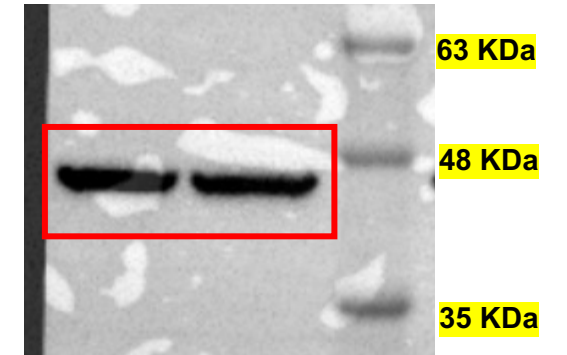

**U251**

Phospho AKT<sup>Thr308</sup>

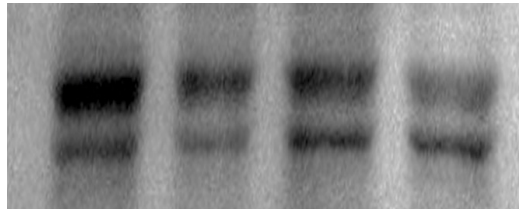

Ctrl APE 100µM N8 100µM N8 25µM

AKT pan

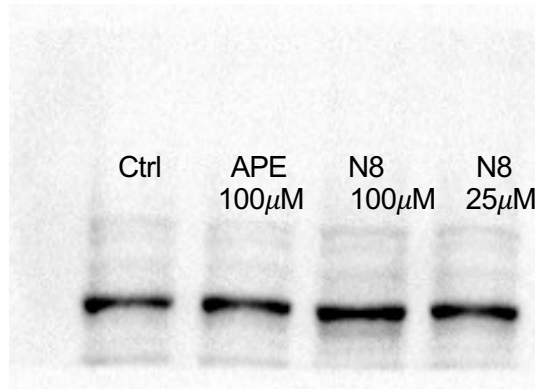

Ctrl APE 100µM N8 100µM N8 25µM

Actin

63 KDa

48 KDa

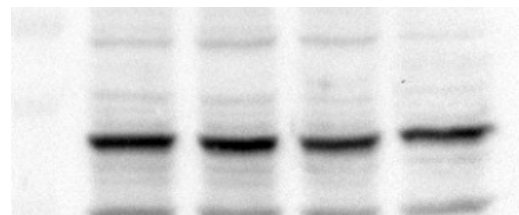

Ctrl APE 100µM N8 100µM N8 25µM

**AKT**

**72h**

Phospho AKT<sup>Thr308</sup>

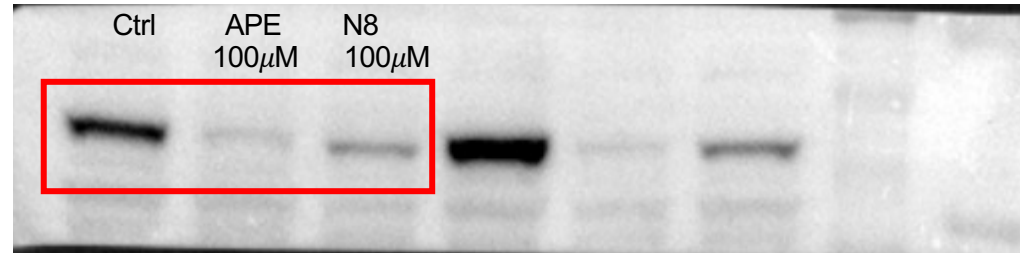

**GB7**

Phospho AKT<sup>Thr308</sup>

61 KDa

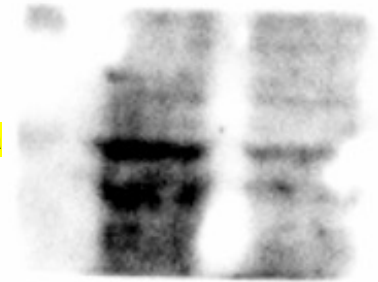

Ctrl N8 3µM

AKT pan

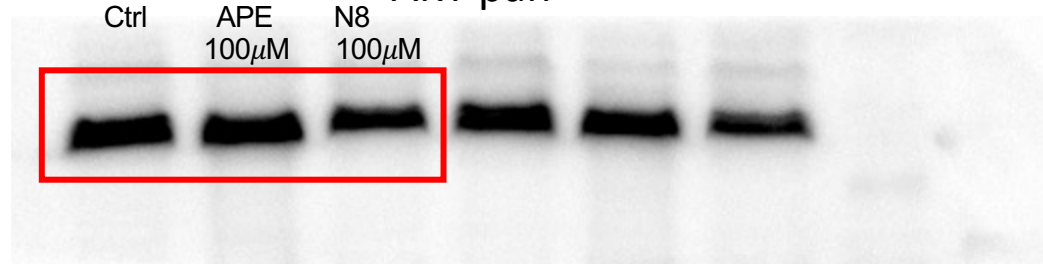

48 KDa

AKT pan

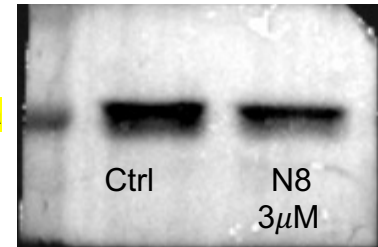

61 KDa

Ctrl N8 3µM

Actin

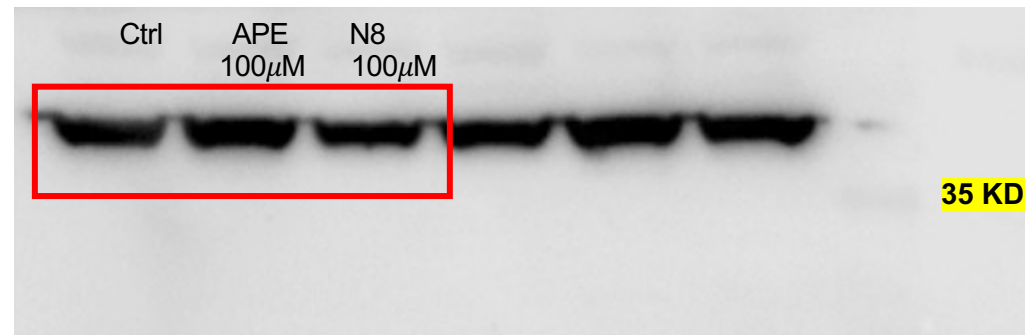

35 KDa

Actin

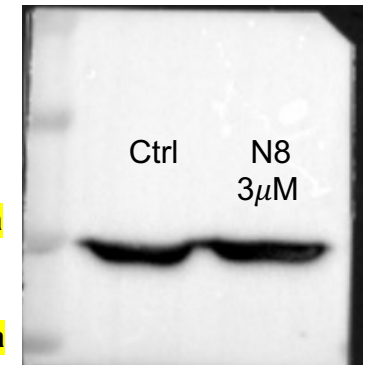

63 KDa

48 KDa

35 KDa

Ctrl N8 3µM

Phospho p70 S6K<sup>Thr389</sup>

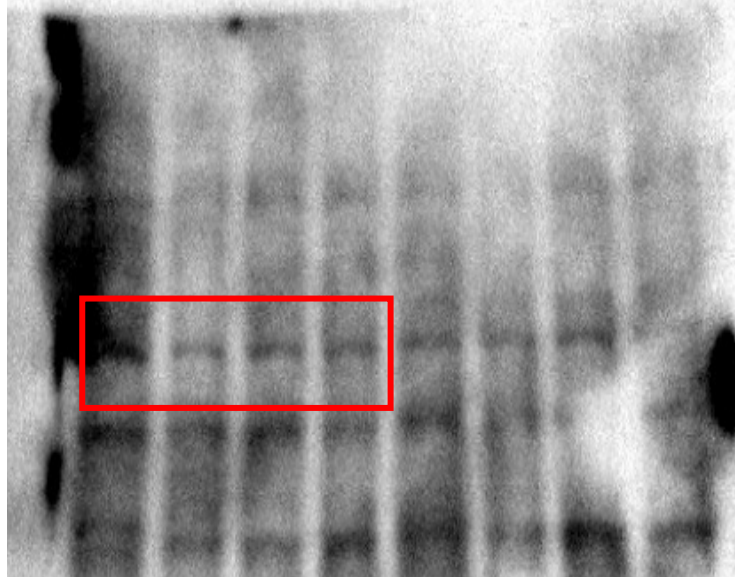

Ctrl APE N8 N8  
100μM 100μM 25μM

Actin

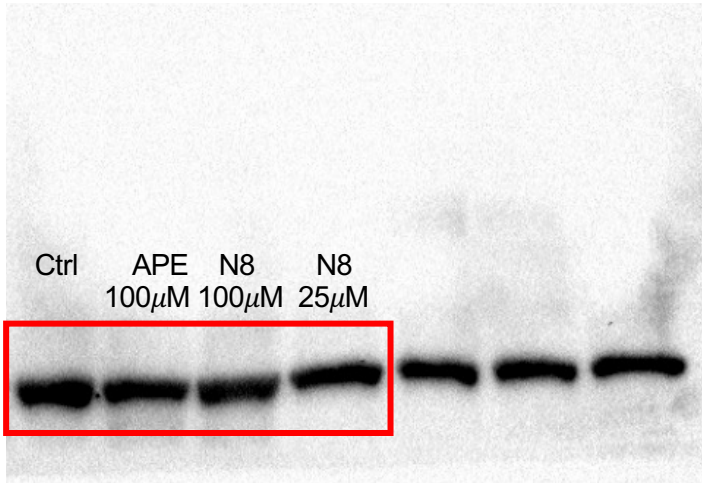

Ctrl APE N8 N8  
100μM 100μM 25μM

P70 S6k 72h

U251

P70 s6k

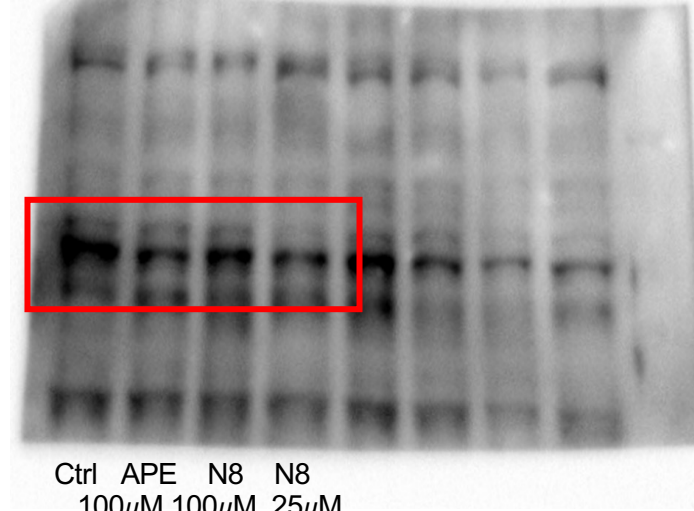

Ctrl APE N8 N8  
100μM 100μM 25μM

P70 s6k

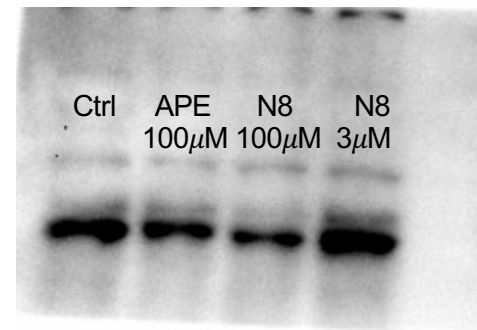

Ctrl APE N8 N8  
100μM 100μM 3μM

GB7

Phospho p70 S6K<sup>Thr389</sup>

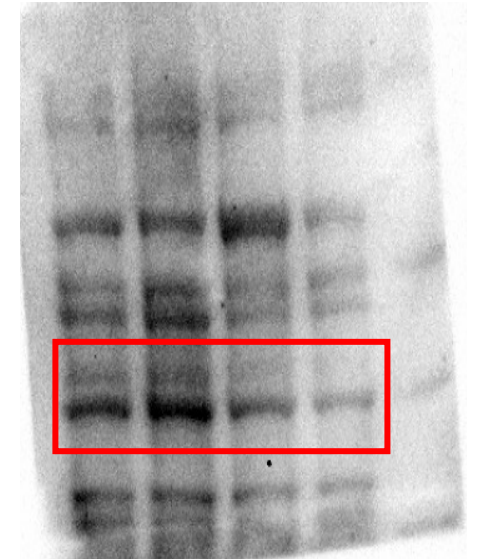

Ctrl APE N8 N8  
100μM 100μM 3μM

Actin

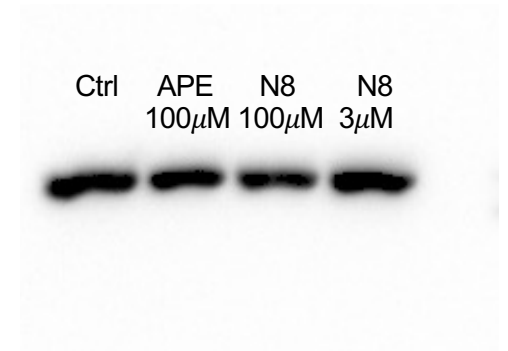

Ctrl APE N8 N8  
100μM 100μM 3μM



Phospho AMPK<sup>Thr172</sup>

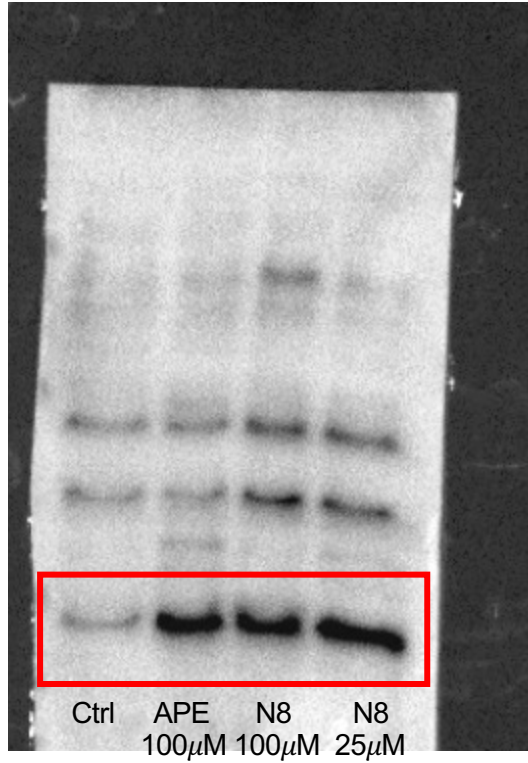

AMPK 72h

U251

GB7

AMPK

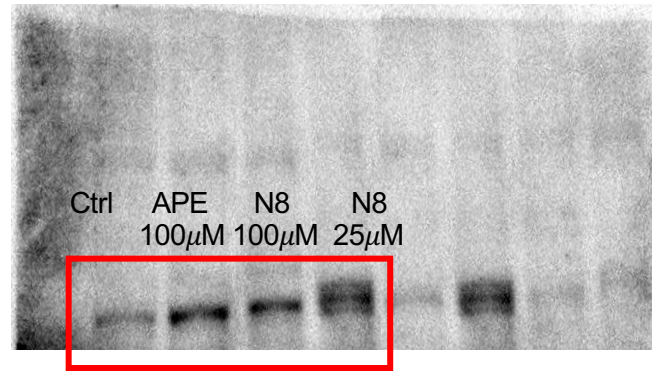

Phospho AMPK<sup>Thr172</sup>

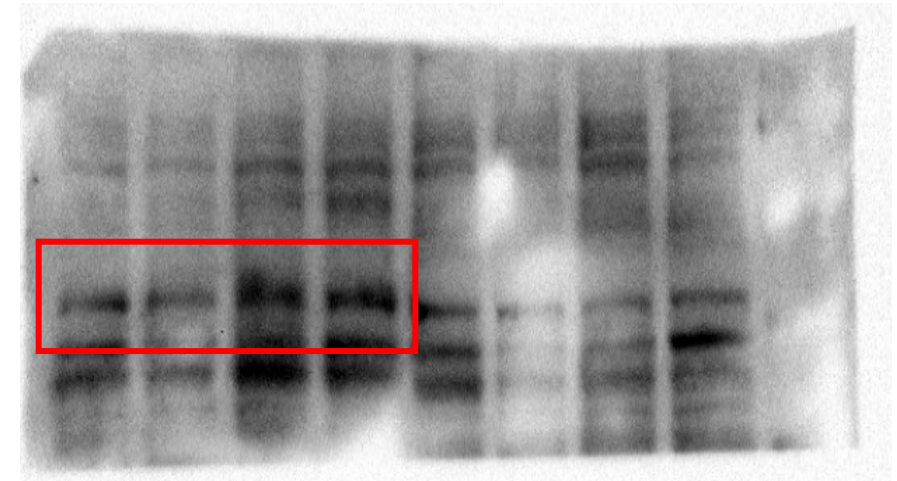

Ctrl APE N8 N8  
100 $\mu$ M 100 $\mu$ M 3 $\mu$ M

Actin

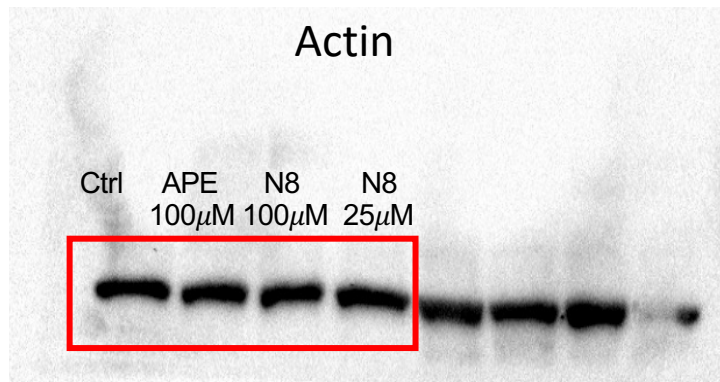

AMPK

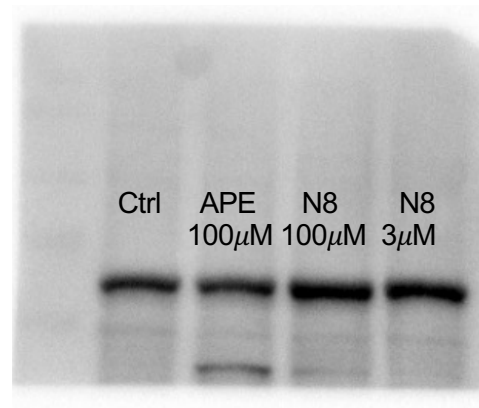

Ctrl APE N8 N8  
100 $\mu$ M 100 $\mu$ M 3 $\mu$ M

Actin

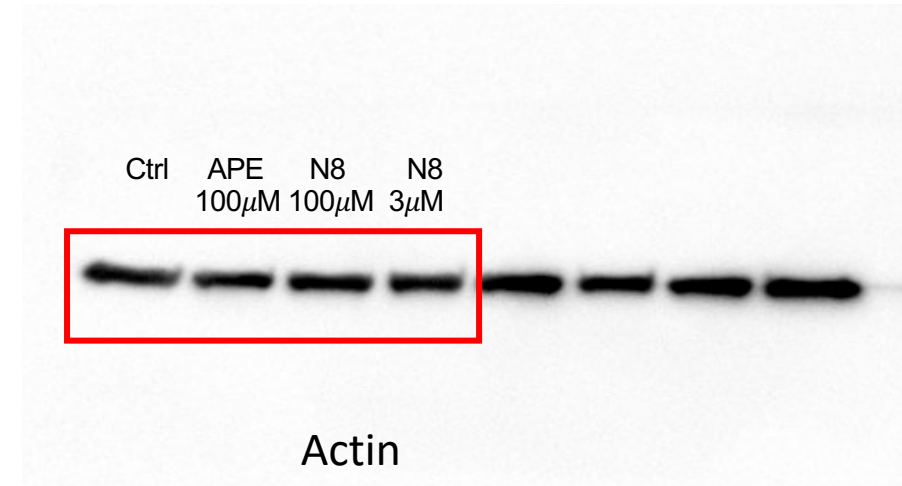



# CASPASE 9

# U251

72H

Caspase-9

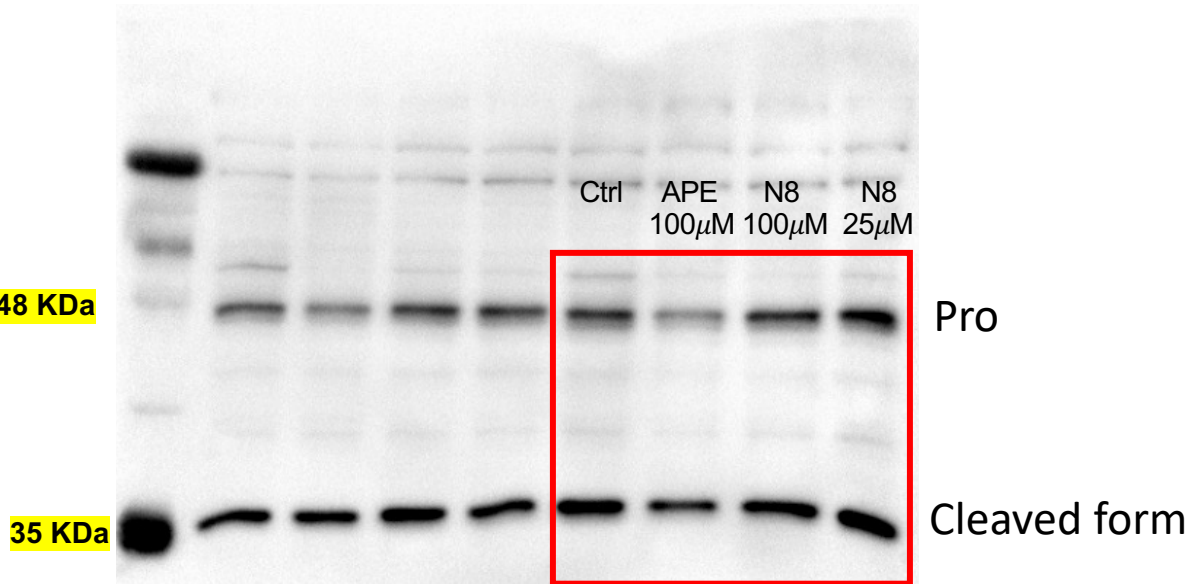

Actin

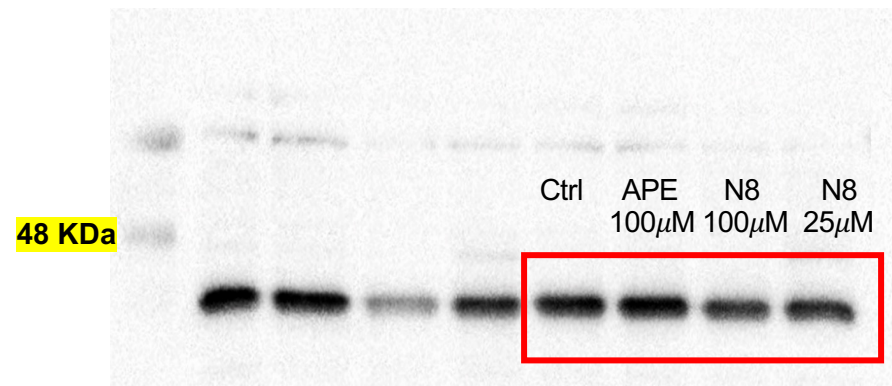

96H

Caspase-9

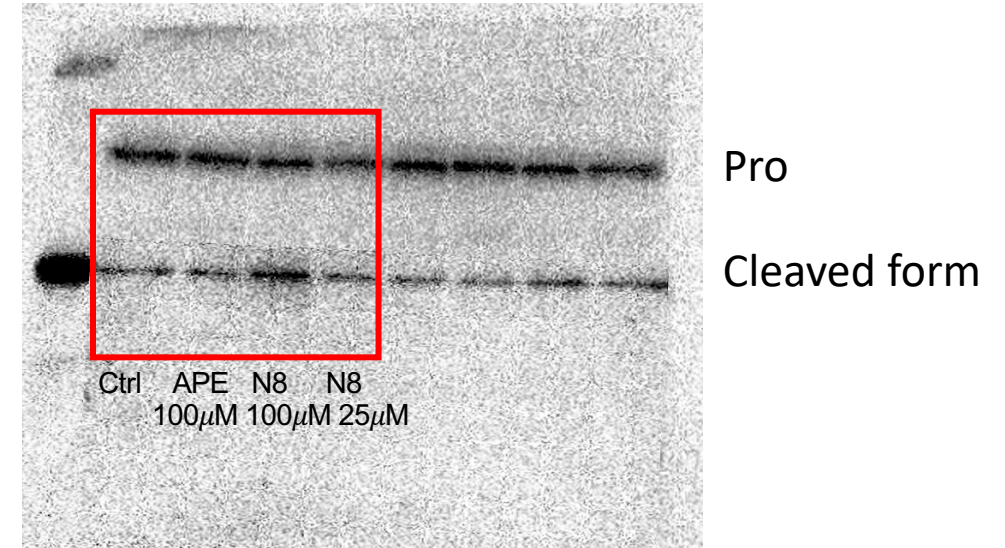

Actin

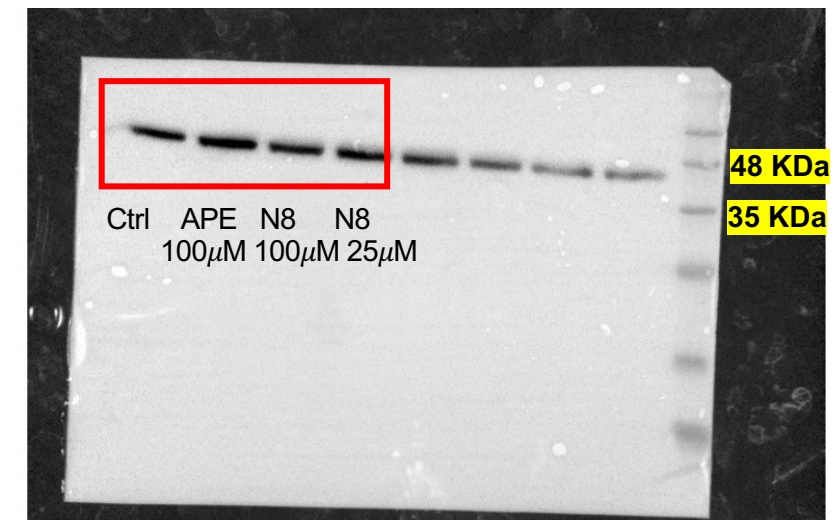

# CASPASE 3 U251

72H

Caspase 3

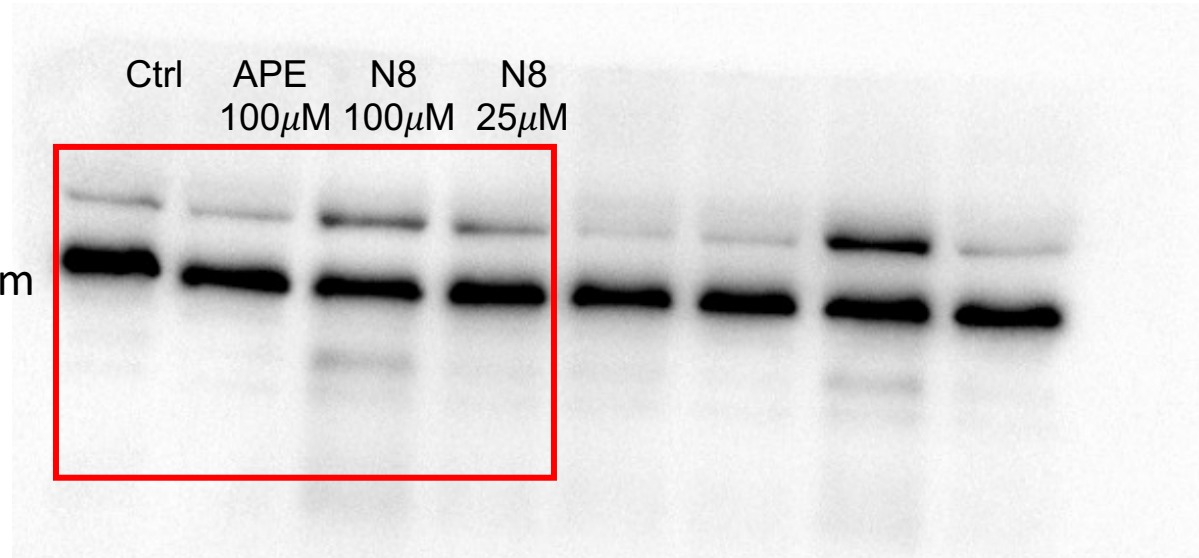

Actin

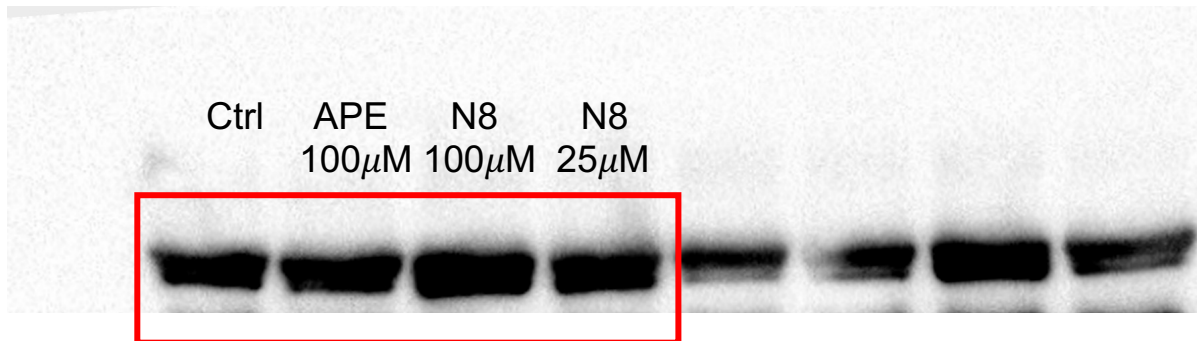

Caspase 3

96H

35 KDa

25 KDa

17 KDa

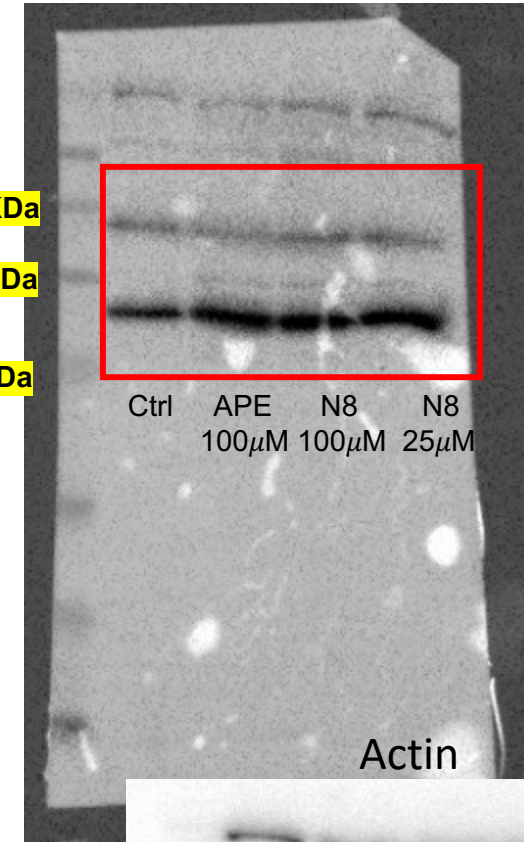

Pro

Cleaved form

Actin

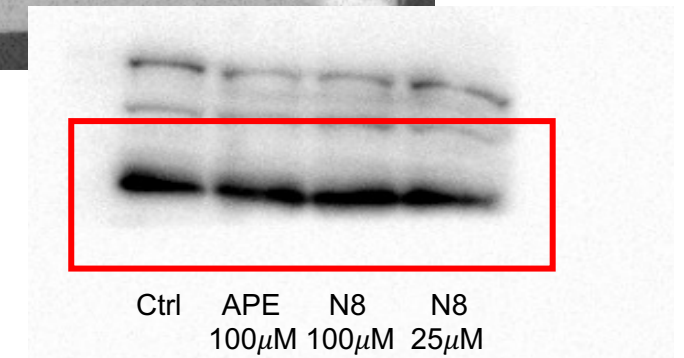



# GB7 Caspases 72h

Caspase 9

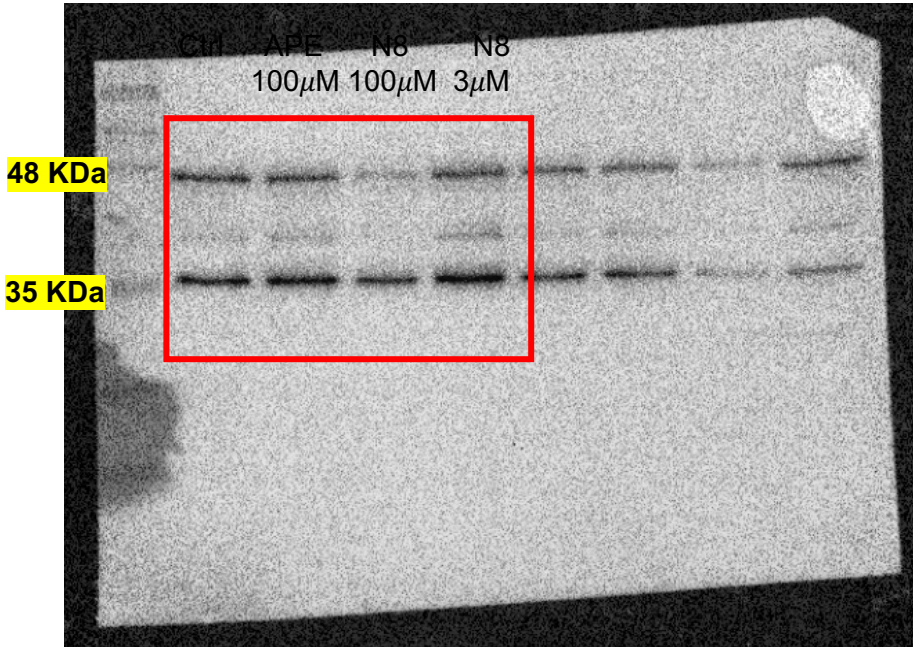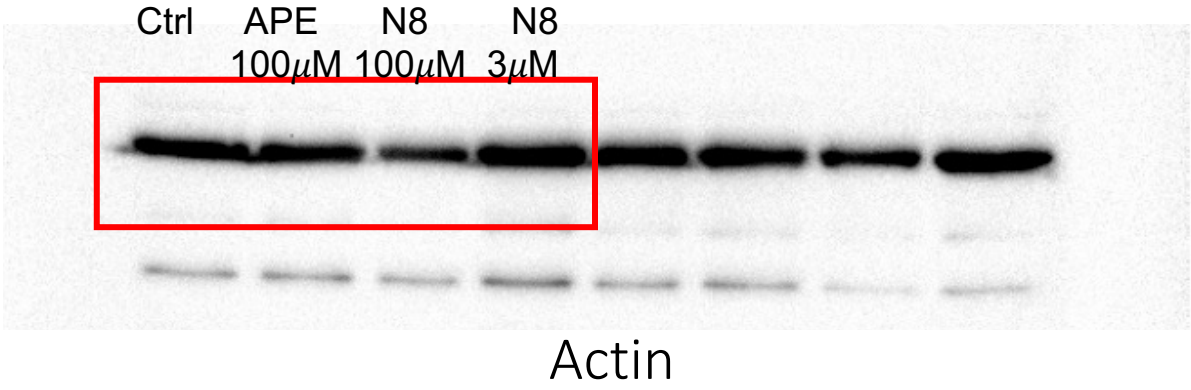

Actin

Caspase 3

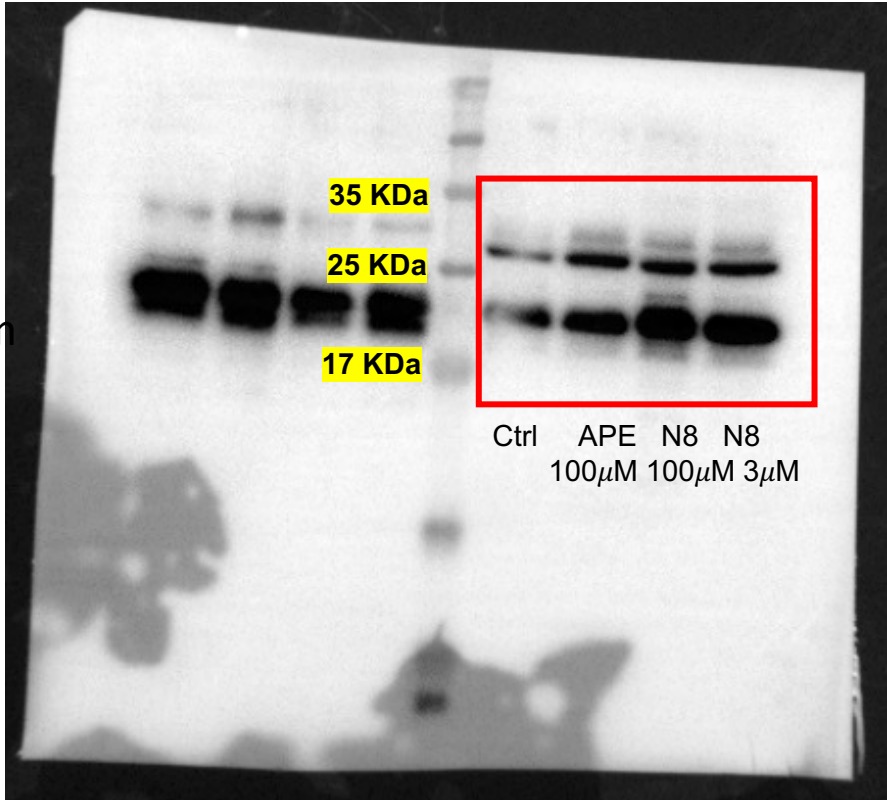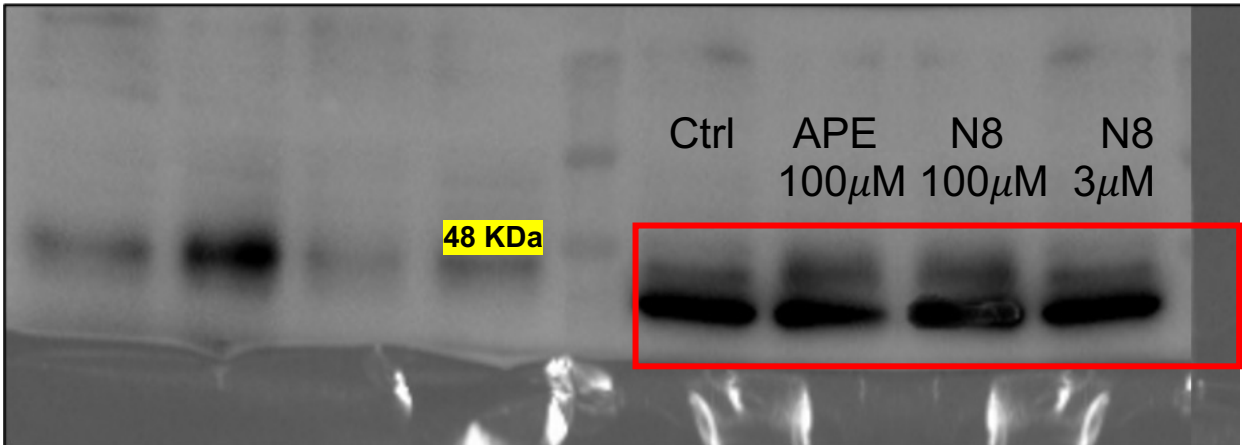

Actin



# CASPASE 9

# U251

# Caspase 9

## 72H

## Caspase 9

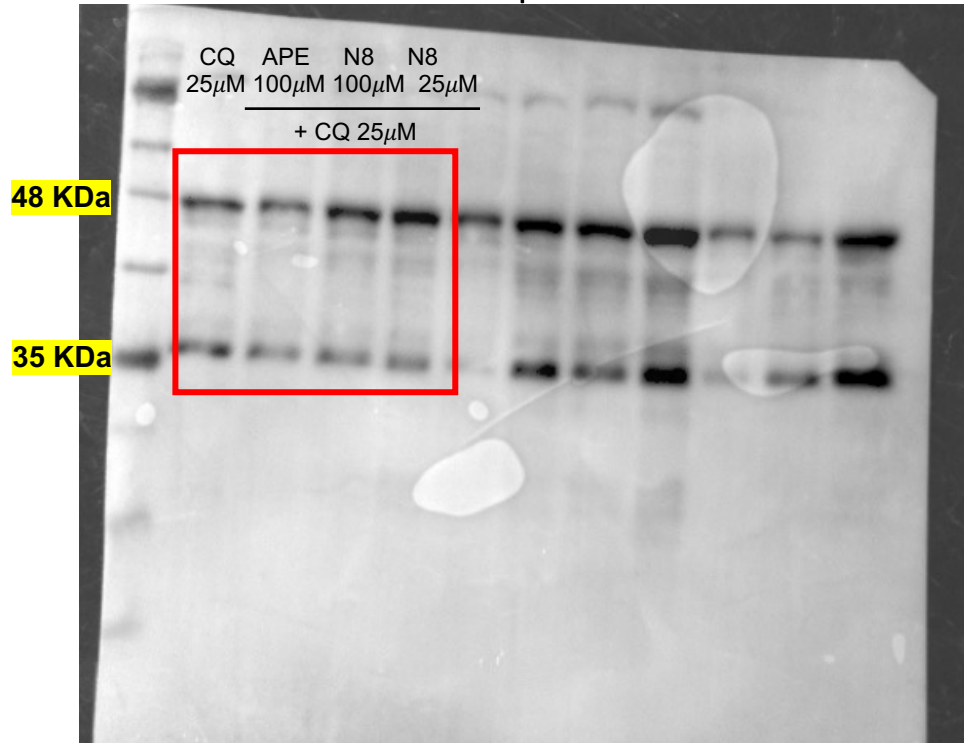

3 KDa

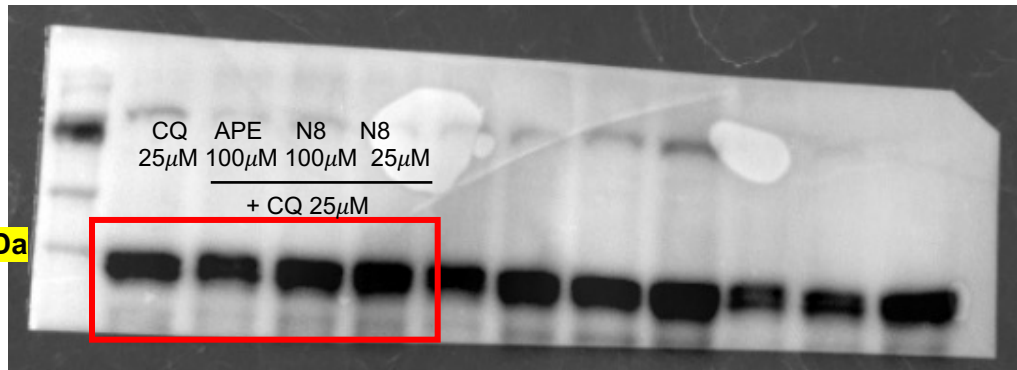

Actin

## 96H

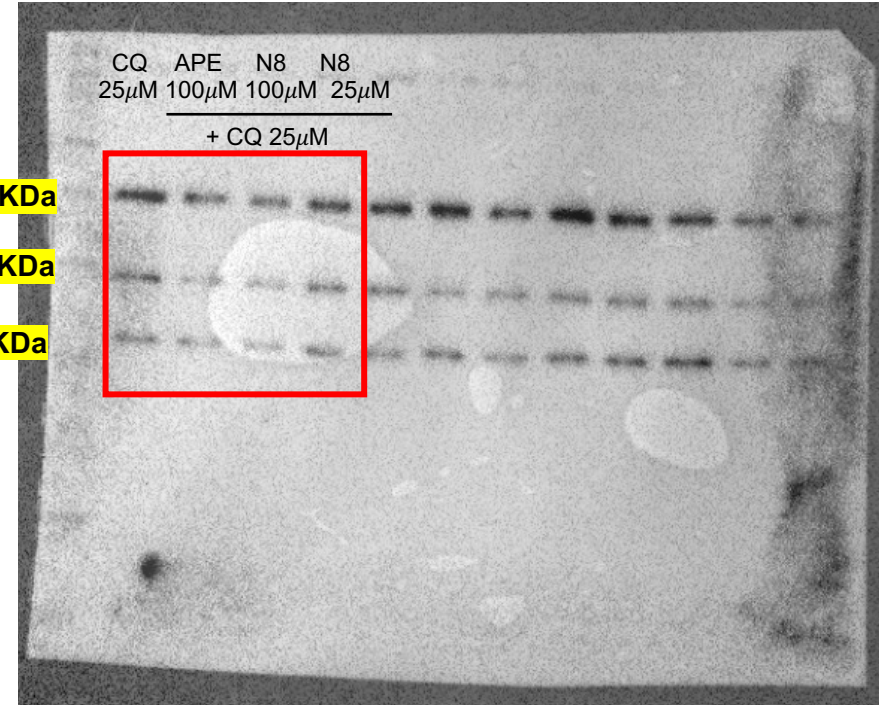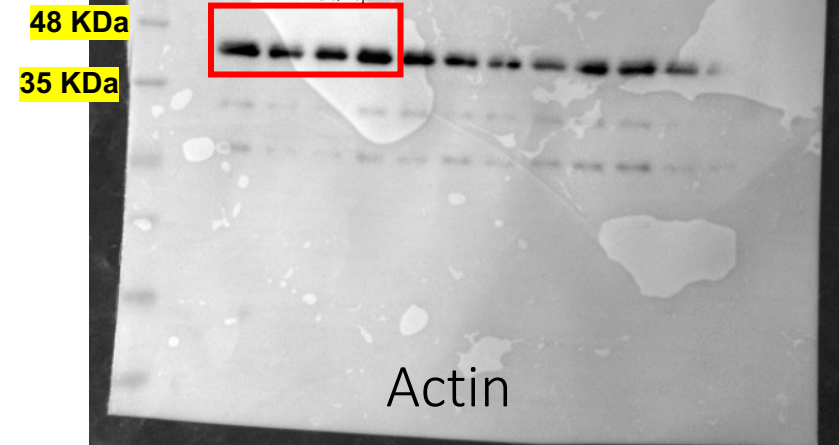

Actin

# CASPASE 3

# U251

# Caspase 3

# 96H

## 72H

## Caspase 3

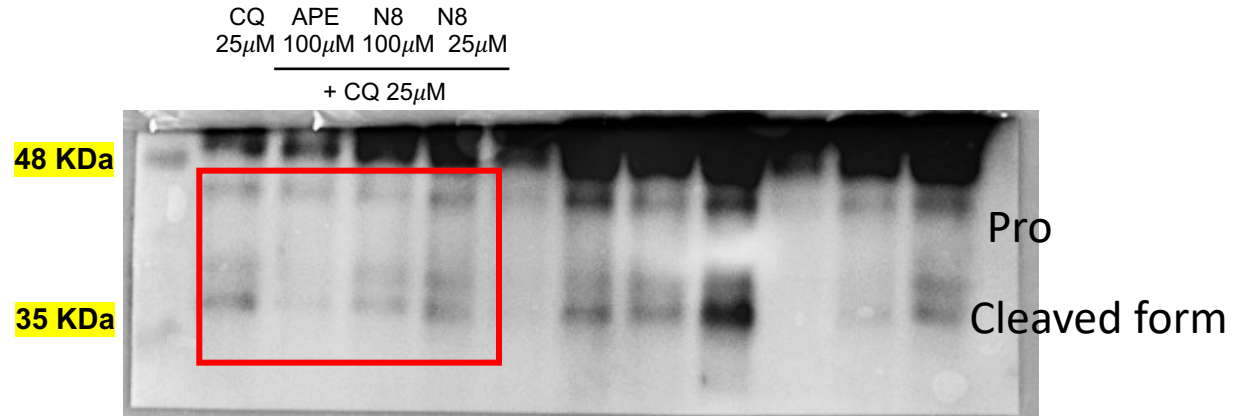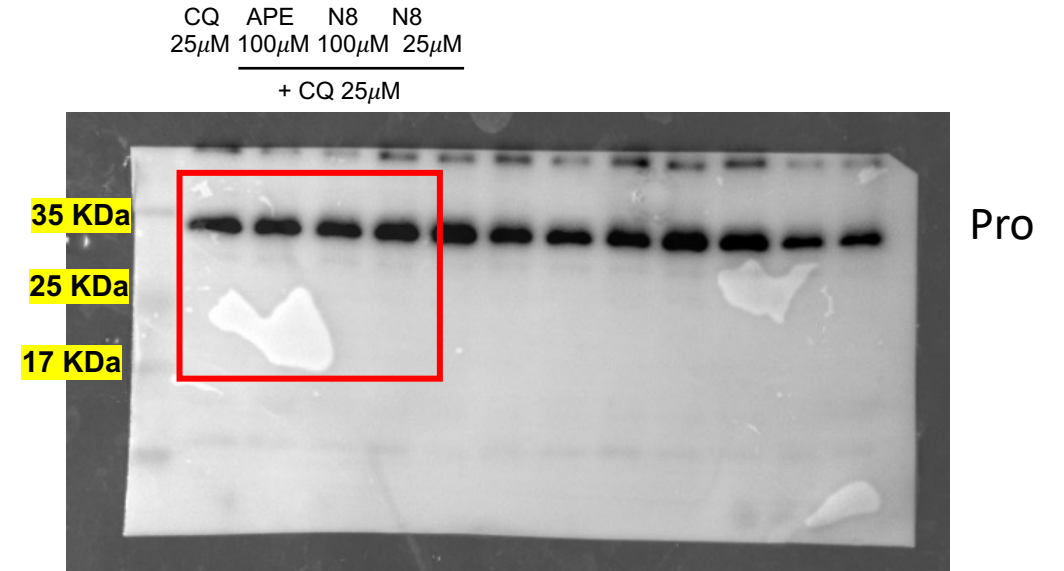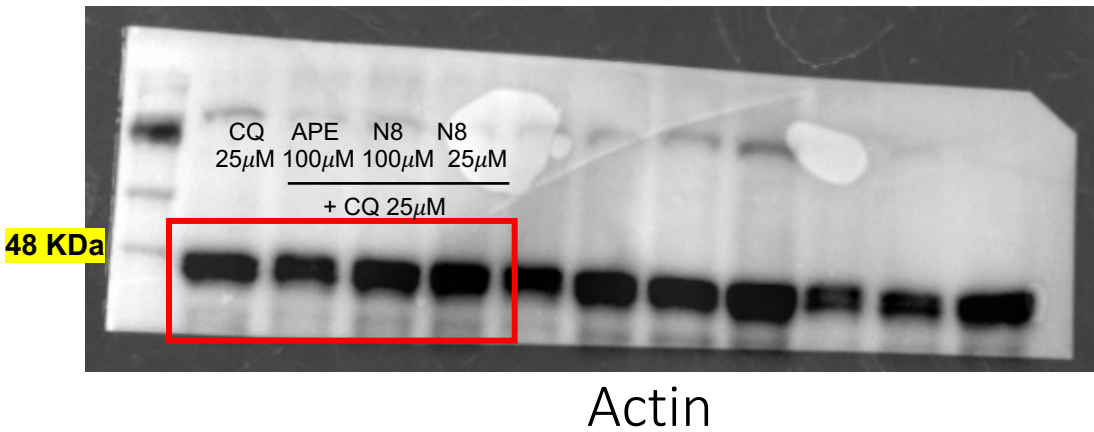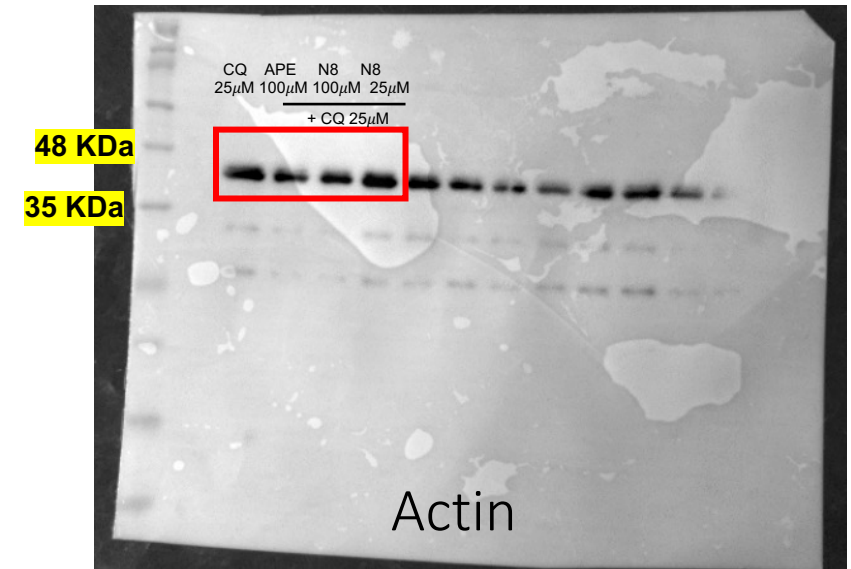

# Caspases GB7 72h

Caspase 9

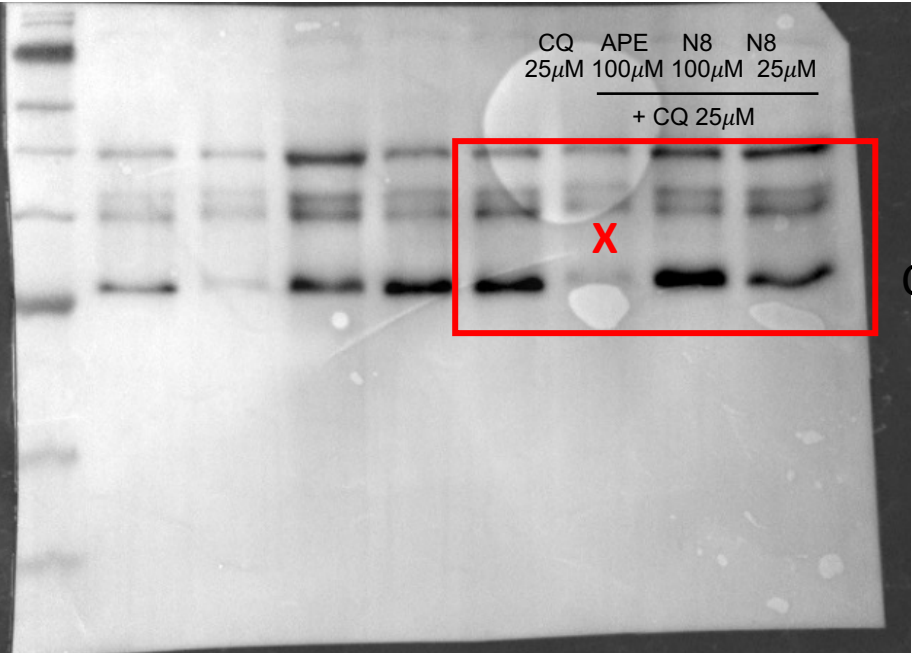

Caspase 3

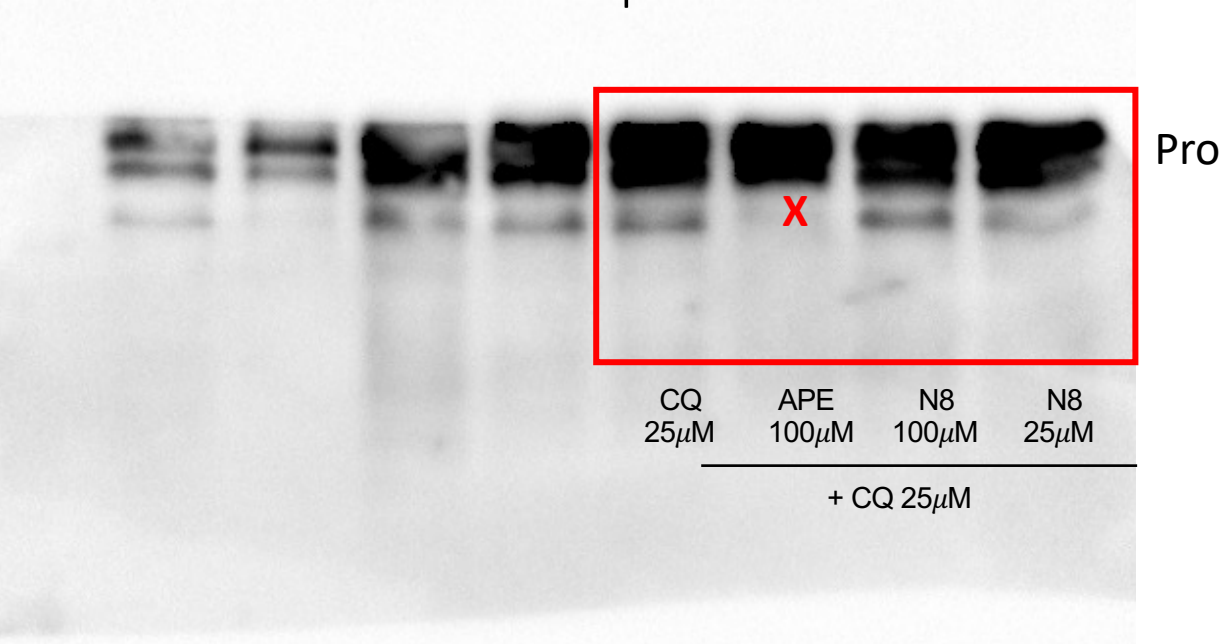

Actin

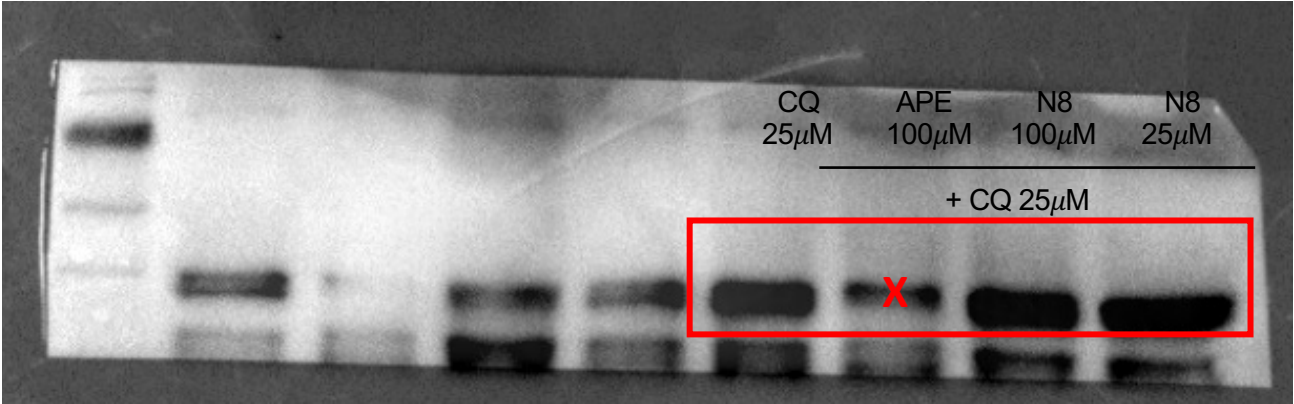

Supplement: Supplementary file 1 [file supplementary]
