# Supplementary material for: M2 Muscarinic Receptor Stimulation Induces Autophagy in Human Glioblastoma Cancer Stem Cells via mTOR Complex-1 Inhibition
Source: Preprints.org preprint supplement (doi:10.20944/preprints202310.1912.v1), 2023-10-30
Supplement: Supplementary file 1 [file cancers-2716493 supplementary.docx]

**Supplementary Materials:**


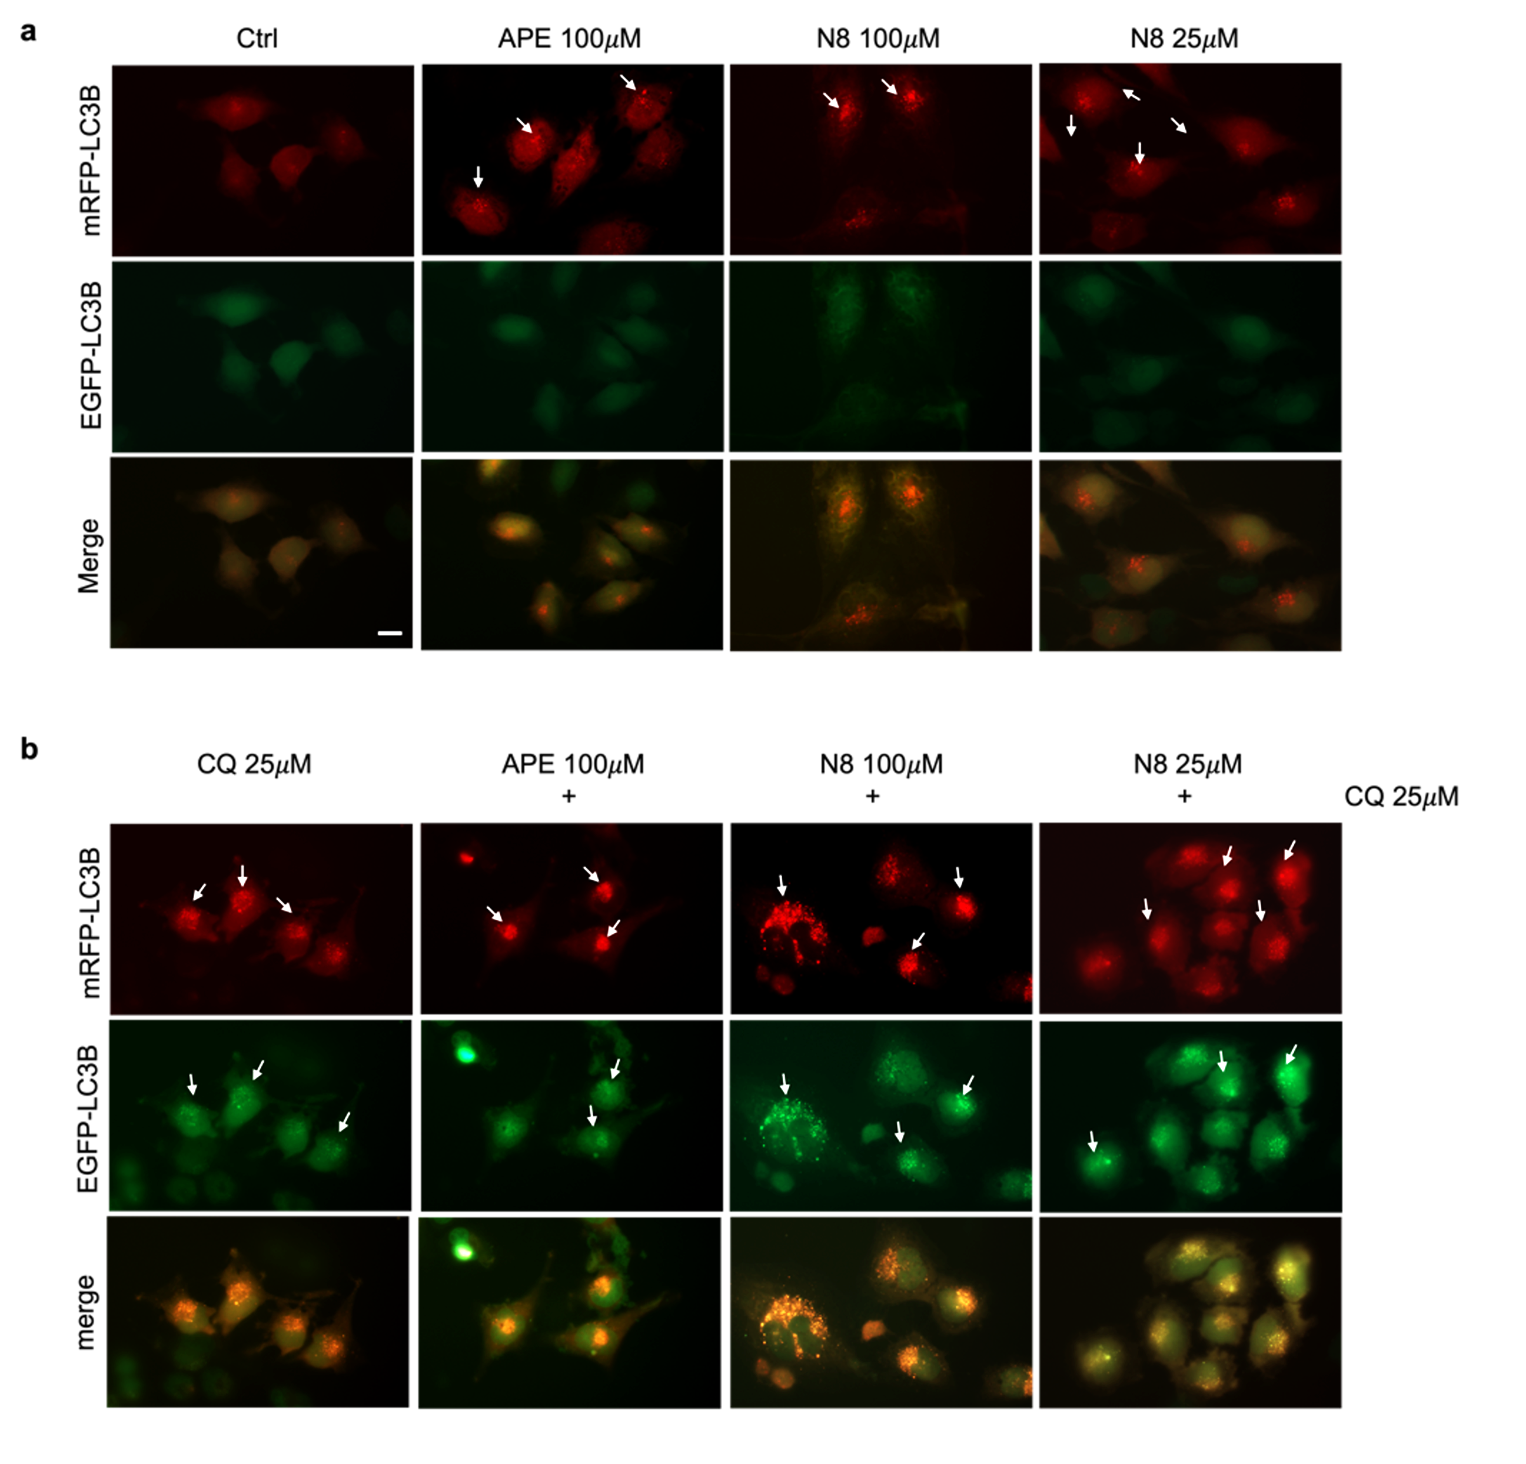
**Figure S1:** Representative images of fluorescence microscopy analysis of the U251 cell line transfected with the mRFP-GFP-LC3B expression vector, treated for 72 h with 100 μM APE, 100 μM N-8-Iper (N8) or 25 μM N-8-Iper (N8)in absent **(a)** or presence of 25 μM CQ **(b)**. Scale bar=10 μm.
